# Supplementary material for: Association among Vitamin D, Retinoic Acid-Related Orphan Receptors, and Vitamin D Hydroxyderivatives in Ovarian Cancer
Source: PubMed Central journal article supplement (PMC7699234; doi:10.3390/nu12113541), 2020-11-19
Supplement: nutrients-12-03541-s001.pdf [file nutrients-12-03541-s001.pdf]

# Association between vitamin D, retinoic acid-related orphan receptors and vitamin D hydroxyderivatives in ovarian cancer

Anna A. Brożyna <sup>1,\*</sup> ORCID ID 0000-0002-3195-9965, Tae-Kang Kim <sup>2</sup> ORCID ID 0000-0003-1394-4134, Marzena Zabłocka <sup>3</sup>, Wojciech Józwicki <sup>4</sup> ORCID ID 0000-0001-9311-1604, Junming Yue <sup>5</sup>, Robert C. Tuckey <sup>6</sup> ORCID ID 0000-0002-5022-4729, Anton Jetten <sup>7</sup> ORCID ID 0000-0003-0954-4445 and Andrzej T. Slominski <sup>2,8,\*</sup> ORCID ID 0000-0002-3792-8940

Table S1. Summary of ROR $\alpha$  expression in ovarian cancer samples.

| Sample                  | Cytoplasmic ROR $\alpha$ [mean A.U.] | Nuclear ROR $\alpha$ [mean A.U.] |
|-------------------------|--------------------------------------|----------------------------------|
| Normal ovary [n=5]      | 90.0                                 | 168.0                            |
| Primary cancer [n=15]   | 27.7                                 | 22.4                             |
| G1                      | 5.0                                  | 23.8                             |
| G2                      | 25.3                                 | 20.2                             |
| G3                      | 44.4                                 | 26.7                             |
| Metastatic cancer [n=4] | 23.8                                 | 6.8                              |

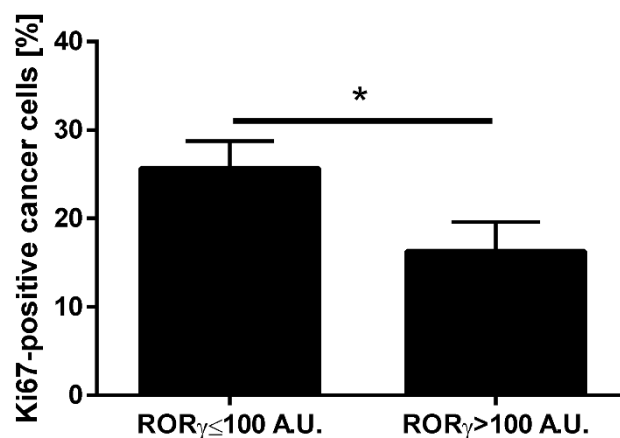

**Figure S1.** The relationship between nuclear ROR $\gamma$  and percentage of Ki-67-positive cells in central parts of the tumor, defined as the older part of the tumor, with no signs of dynamic growth [60]. Statistically significant differences are denoted with asterisks as determined by Student's t-test ( $*p < 0.05$ ).
